# Supplementary material for: Estimating loss in quality of life associated with asthma-related crisis events (ESQUARE): a cohort, observational study
Source: Springer Nature journal article supplement (doi:10.1186/s12955-019-1138-5), 2019-04-11

Figure 1: Flow chart of study design

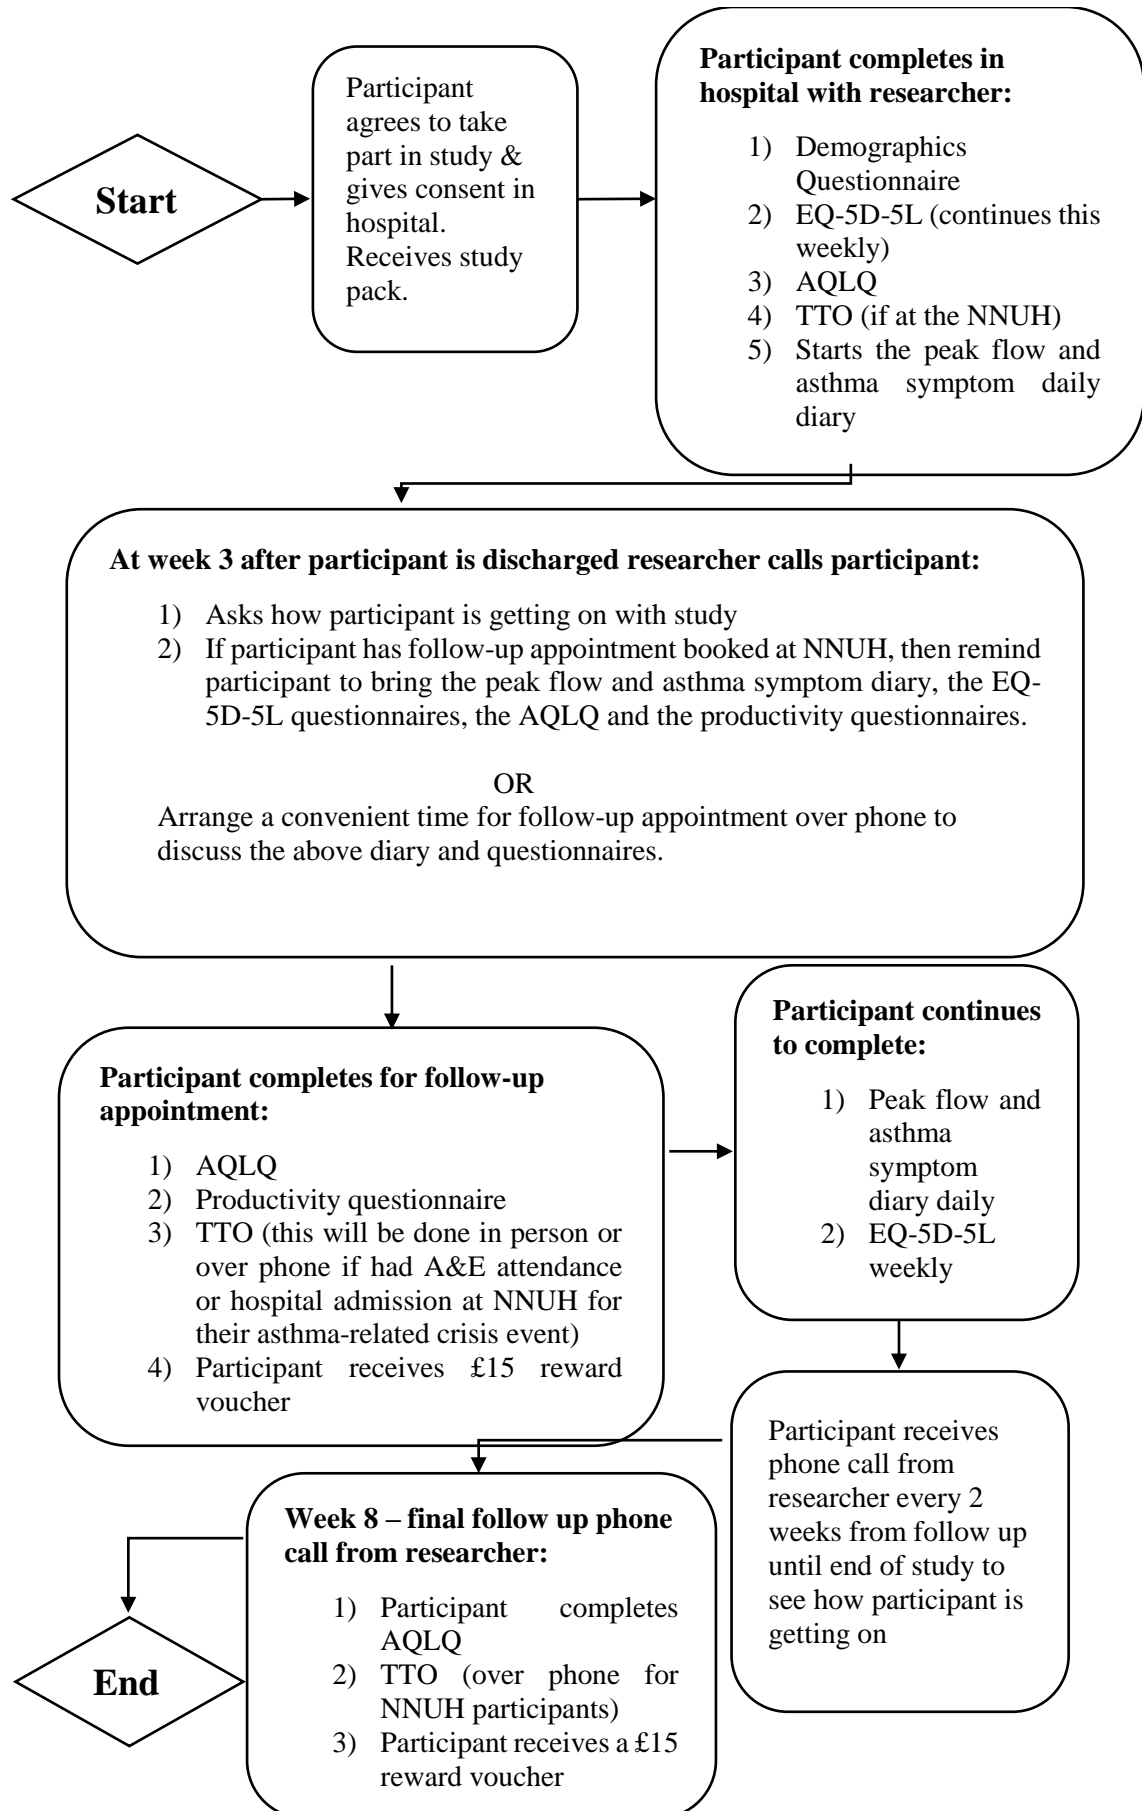

Supplement: MOESM1 [file 16650206]
