# Supplementary material for: Estimating loss in quality of life associated with asthma-related crisis events (ESQUARE): a cohort, observational study
Source: Springer Nature journal article supplement (doi:10.1186/s12955-019-1138-5), 2019-04-11
Supplement: MOESM2 [file 16650206]

Table 1: Mean changes in utility and score values between week 4 and week 8 (available case analysis)

| Outcome measure           | N  | 4 weeks<br><i>Mean ± (SD)</i> | 8 weeks<br><i>Mean ± (SD)</i> | Mean difference<br><b>(95% CI)</b> | P-value |
|---------------------------|----|-------------------------------|-------------------------------|------------------------------------|---------|
| <b>EQ-5D-5L (utility)</b> | 59 | 0.745 ± 0.255                 | 0.720 ± 0.302                 | 0.025 (0.033 to 0.082)             | 0.394   |
| <b>VAS (score)</b>        | 61 | 67.41 ± 20.31                 | 68.51 ± 22.13                 | 1.10 (4.60 to 2.41)                | 0.533   |
| <b>AQLQ (score)</b>       | 57 | 4.23 ± 1.52                   | 4.52 ± 1.55                   | 0.291 (0.536 to 0.046)             | 0.021*  |
| <b>AQL-5D (utility)</b>   | 56 | 0.700 ± 0.179                 | 0.740 ± 0.181                 | 0.040 (0.078 to 0.002)             | 0.041*  |
| <b>TTO (utility)</b>      | 76 | 0.813 ± 0.268                 | 0.794 ± 0.290                 | -0.019 (-0.047 to 0.086)           | 0.561   |

Wilcoxon signed-rank test

\*p-value <0.05 therefore statistically significant at the 5% level

Estimating loss in quality of life associated with asthma-related crisis events (ESQUARE): a cohort, observational study  
Additional file 2
