# Supplementary material for: Estimating loss in quality of life associated with asthma-related crisis events (ESQUARE): a cohort, observational study
Source: Springer Nature journal article supplement (doi:10.1186/s12955-019-1138-5), 2019-04-11
Supplement: MOESM4 [file 16650206]

Figure 1: Mean scores for difficulties sleeping, symptoms and activities at daily time points

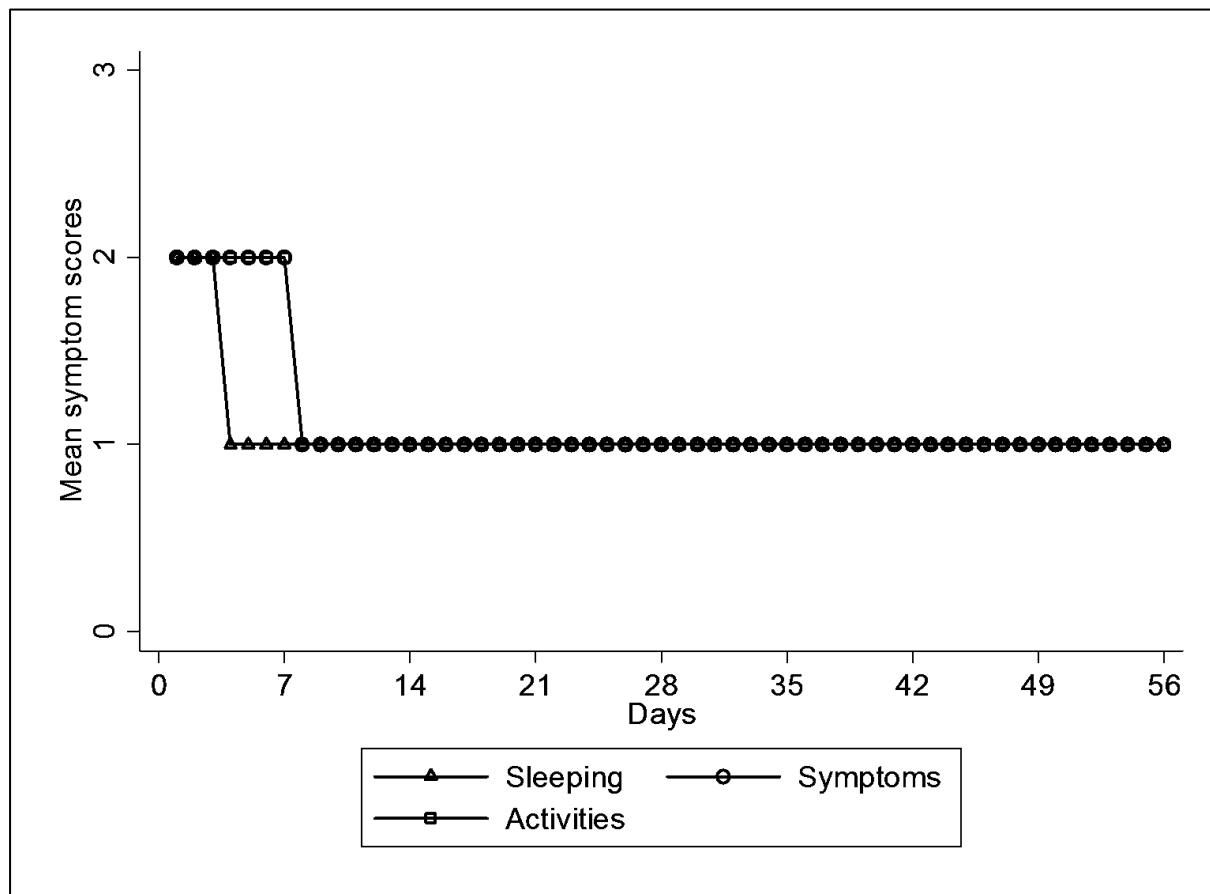

y-axis: 0 = no symptoms, 1 = mild symptoms, 2 = moderate symptoms, 3 = severe symptoms
