# Supplementary material for: Estimating loss in quality of life associated with asthma-related crisis events (ESQUARE): a cohort, observational study
Source: Springer Nature journal article supplement (doi:10.1186/s12955-019-1138-5), 2019-04-11
Supplement: MOESM6 [file 16650206]

*Table 1: Week 8 statistics for each quality of life questionnaires*

| <b>Item</b>                     | <b>N</b> | <b>Mean</b> | <b>SD</b> | <b>Range</b>   | <b>Response rates</b> | <b>Floor effects</b> | <b>Ceiling effects</b> |
|---------------------------------|----------|-------------|-----------|----------------|-----------------------|----------------------|------------------------|
| <b>EQ-5D-5L (utility)</b>       | 65       | 0.725       | 0.292     | -0.215to 1.00  | 53.7%                 | 0.00%                | 21.5%                  |
| <b>EQ-5D VAS score</b>          | 65       | 68.06       | 21.91     | 5.00 to 100.00 | 53.7%                 | 0.00%                | 0.00%                  |
| <b>AQLQ overall score</b>       | 65       | 4.48        | 1.50      | 1.47 to 7.00   | 53.7%                 | 0.00%                | 0.00%                  |
| <b>AQLQ Symptoms score</b>      | 66       | 3.64        | 2.22      | 0.00 to 7.00   | 54.5%                 | 0.00%                | 0.00%                  |
| <b>AQLQ Activity score</b>      | 66       | 3.68        | 2.13      | 0.00 to 7.00   | 54.5%                 | 0.00%                | 0.00%                  |
| <b>AQLQ Emotional score</b>     | 66       | 3.72        | 2.39      | 0.00 to 7.00   | 54.5%                 | 0.00%                | 1.50%                  |
| <b>AQLQ Environmental score</b> | 66       | 3.91        | 2.33      | 0.00 to 7.00   | 54.5%                 | 0.00%                | 1.50%                  |
| <b>AQL-5D (utility)</b>         | 64       | 0.737       | 0.176     | 0.450 to 1.00  | 52.9%                 | 0.00%                | 7.80%                  |
| <b>TTO (utility)</b>            | 80       | 0.787       | 0.295     | 0.000 to 1.00  | 71.4%*                | 0.00%                | 51.3%                  |

\*The response rate is based on the denominator being 112 due to only the participants based at the Norwich hospital site (NNUH) being asked the TTO questions. All of the other response rates for the PROMS were based on the denominator being 121 as this was the total number recruited across all hospital sites where each participant was asked to complete PROM questionnaires.

Ranges for PROMs: EQ-5D-5L (-0.281 to 1); EQ-5D VAS (0 to 100); AQLQ (0 to 7); AQL-5D (0 to 1); TTO (0 to 1).
